# Supplementary material
Source: PubMed Central journal article supplement (PMC3950887)
Supplement: es404395a_si_001.pdf [file es404395a_si_001.pdf]

## Supporting Information

### Hypoxia Sustains Cyanobacteria Blooms in the Baltic Sea

Carolina P. Funkey<sup>1</sup>, Daniel J. Conley<sup>1</sup>, Nina S. Reuss<sup>2</sup>, Christoph Humborg<sup>3</sup>, Tom Jilbert<sup>4</sup>,  
and Caroline P. Slomp<sup>4</sup>

<sup>1</sup> Department of Geology, Lund University, Sölvegatan 12, SE-22362 Lund Sweden

<sup>2</sup> Department of Biology, University of Copenhagen, Helsingørsgade 51, DK-3400 Hillerød, Denmark

<sup>3</sup> Department of Applied Environmental Science, Stockholm University, Svante Arrhenius väg 8, SE-11418 Stockholm Sweden

<sup>4</sup> Department of Earth Sciences, Utrecht University, P.O. Box 80.021 3508 TA Utrecht, The Netherlands

\* To whom correspondence should be addressed. E-mail: carolina.funkey@geol.lu.se

Telephone: +(46) 046-222-0107

#### *Contents Summary:*

|                                                             | Caption Page # | Figure/Table Page # |
|-------------------------------------------------------------|----------------|---------------------|
| <i>Figure S1</i> - Age model used                           | S2             | S4                  |
| <i>Figure S2</i> - Complete chronology of LL19 and F80      | S2             | S4                  |
| <i>Table S1</i> - Raw data for Northern Gotland Deep (LL19) | S2             | S5-S8               |
| <i>Table S2</i> - Raw data for Fårö Deep (F80)              | S3             | S9-S13              |
| References                                                  | S3             |                     |

**Figure S1.** Tuning of LL19 and F80  $C_{org}$  profiles to the Loss On Ignition (LOI) profile of 372740-3 (Lougheed et al., 2012). Although each coring site is located in a separate sub-basin of the Baltic (core 322740-3 in the Gotland Deep; F80 in the Fårö Deep and LL19 in the Northern Gotland Basin), the profiles can be easily correlated, indicating coherent Baltic-wide changes in organic matter accumulation during the Holocene. The age model for 372740-3 was constructed on the basis of two lead (Pb) pollution isochrones identified in a neighboring core (370530-5), and 10 paleomagnetic secular variation (PSV) features in 370530-5 and a third core (370540-6). The Pb pollution isochrones are sedimentary Pb concentration markers related to peaks in silver production in Europe. These have been dated using varve chronologies of European lakes[1] and later identified in Baltic Sea sediments[2]. PSV features are magnetic mineral inclination and declination markers related to directional oscillations in the geomagnetic field. These have been dated using varve chronologies of Scandinavian lakes[3] and later identified in Baltic Sea sediments[4]. The positions of the dating points are indicated in the left column of the plot. 29 peaks and troughs in the LOI and  $C_{org}$  profiles were subsequently used to tune LL19 and F80 to 372740-3. The positions of these tuning points are indicated in the right column. Linear interpolation was applied between all tuning points. Absolute dating error varies with depth (see Fig. 9 of Lougheed et al., 2012); 68.2% confidence interval yields typical errors of +/- 100-200 years.

**Figure S2.** Complete chronology of LL19 and F80 as reported in the manuscript, showing concentration profiles of  $C_{org}$ . The uppermost 150 years of each core are dated independently by  $^{210}\text{Pb}$  radiochronology, using a constant rate of  $^{210}\text{Pb}$  supply (CRS) model. The interval from 750 to 6290 yrs BP is dated by tuning to the Pb/PSV-dated core 372740-3 (see Figure S1). In ‘Extrapolation 1’, a constant sedimentation rate was assumed between the oldest  $^{210}\text{Pb}$  dating point and the youngest PSV/Pb dating point. ‘Extrapolation 2’ indicates an interval below the oldest PSV/Pb dating point, for which LOI data for 322740-3 is present. The LL19 and F80 records are tuned to LOI in 322740-3, assuming a constant sedimentation rate of 322740-3 equal to that of the oldest dated interval. For LL19 only, ‘Extrapolation 3’ indicates an interval for which no equivalent LOI data from 322740-3 are present. The mean sedimentation rate of LL19 during interval ‘Extrapolation 2’ is assumed constant throughout this interval. Linear interpolation was applied between all dating points.

**Table S1.** Raw data for the proxies used in this study: years for Mo/Al only years B.P. (present= A.D. 2010), molybdenum/aluminum (%/%), years (for corresponding to the other

variables) in years B.P, total % carbon, zeaxanthin and echinenone ( $\mu\text{mol}$  pigment per gram of sediment normalized to total % carbon),  $\delta^{15}\text{N}$  vs air (‰), and pheophytin-a/ chlorophyll-a (mole ratio) for Northern Gotland Deep (LL19).

**Table S2.** Raw data for the proxies used in this study: years for Mo/Al only years B.P. (present= A.D. 2010), molybdenum/aluminum (%/%), years (for corresponding to the other variables) in years B.P, total % carbon, zeaxanthin and echinenone ( $\mu\text{mol}$  pigment per gram of sediment normalized to total % carbon),  $\delta^{15}\text{N}$  vs air (‰), and pheophytin-a/ chlorophyll-a (mole ratio) for Fårö Deep (F80).

#### References:

1. Renberg, I.; Bindler, R.; Brännvall, M. L., Using the historical atmospheric lead-deposition record as a chronological marker in sediment deposits in Europe. *The Holocene* **2001**, *11*, 511-516.
2. Zillen, L.; Lenz, C.; Jilbert, T., Stable lead (Pb) isotopes and concentrations - A useful independent dating tool for Baltic Sea sediments. *Quaternary Geochronology* **2012**, *8*.
3. Snowball, I.; Zillen, L.; Ojala, A.; Saarinen, T.; Sandgren, P., FENNOSTACK and FENNORPIS: varve dated Holocene palaeomagnetic secular variation and relative palaeointensity stacks for Fennoscandia. *Earth and Planetary Science Letters* **2007**, *255*, 106-116.
4. Lougheed, B. C.; Snowball, I.; M., M.; Kabel, K.; Muscheler, R.; Virtasalo, J. J.; Wacker, L., Using an independent geochronology based on palaeomagnetic secular variation (PSV) and atmospheric Pb deposition to date Baltic Sea sediments and infer 14C reservoir age. *Quaternary Science Reviews* **2012**, *42*, 43-58.

Figure S1

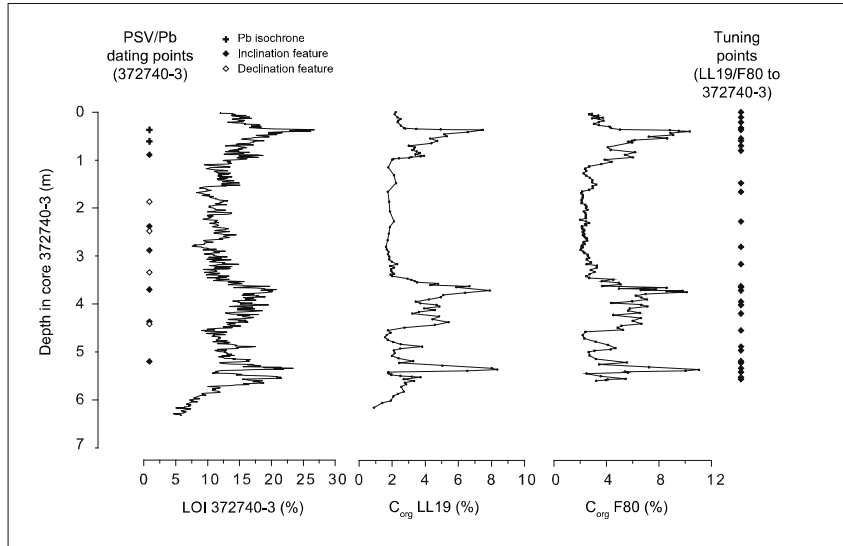

Figure S2

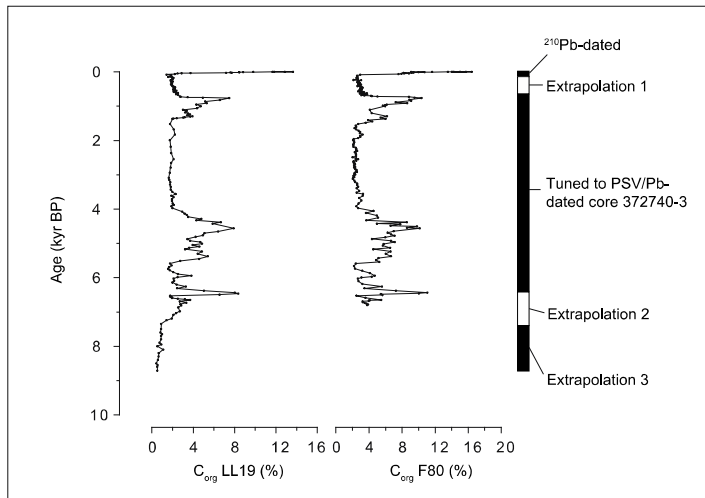

**Table S1**

| <b>Year for Mo/Al</b> | <b>Mo/Al</b> | <b>Year</b> | <b>Total % Carbon</b> | <b>Zeaxanthin</b> | <b>Echinenone</b> | <b><math>\delta^{15}\text{N}</math> vs air (‰)</b> | <b>Pheophytin-a/<br/>Chl-a</b> |
|-----------------------|--------------|-------------|-----------------------|-------------------|-------------------|----------------------------------------------------|--------------------------------|
| 0.0                   | 0.00292      | 16.0        | 9.716                 | 0.4798            | 0.1374            | 3.670                                              | 1.9924                         |
| 1.3                   | 0.00421      | 25.0        | 8.378                 | 0.4480            | 0.1180            | 3.116                                              | 1.9094                         |
| 2.4                   | 0.00394      | 36.0        | 2.787                 | 0.0935            | 0.0336            | 3.529                                              | 1.9514                         |
| 3.7                   | 0.00351      | 43.1        | 2.463                 | 0.1200            | 0.0620            | 3.357                                              | 1.2178                         |
| 5.0                   | 0.00262      | 60.2        | 2.154                 | 0.1169            | 0.0591            | 3.475                                              | 1.4112                         |
| 8.5                   | 0.00249      | 77.4        | 2.095                 | 0.0917            | 0.0468            | 3.272                                              | 1.6603                         |
| 12.2                  | 0.00264      | 94.5        | 2.104                 | 0.1168            | 0.0463            | 3.235                                              | 1.8512                         |
| 15.8                  | 0.00263      | 111.6       | 2.007                 | 0.0995            | 0.0487            | 3.054                                              | 1.7359                         |
| 19.4                  | 0.0029       | 128.8       | 2.003                 | 0.1119            | 0.0564            | 3.743                                              | 1.5849                         |
| 24.7                  | 0.00347      | 145.9       | 1.969                 | 0.0978            | 0.0524            | 3.681                                              | 1.7799                         |
| 30.6                  | 0.00208      | 163.0       | 2.020                 | 0.0954            | 0.0522            | 3.347                                              | 1.8056                         |
| 36.5                  | 0.00031      | 180.2       | 2.082                 | 0.0950            | 0.0493            | 3.192                                              | 2.1012                         |
| 40.8                  | 0.00013      | 197.3       | 2.160                 | 0.0933            | 0.0502            | 3.124                                              | 2.1596                         |
| 50.9                  | 0.00012      | 214.4       | 2.231                 | 0.0888            | 0.0472            | 2.995                                              | 2.1890                         |
| 64.9                  | 0.00012      | 231.6       | 2.271                 | 0.0826            | 0.0466            | 2.757                                              | 2.2671                         |
| 79.4                  | 0.0001       | 248.7       | 2.253                 | 0.0894            | 0.0527            | 2.949                                              | 2.0677                         |
| 97.7                  | 0.00009      | 265.8       | 2.250                 | 0.0562            | 0.0279            | 2.815                                              | 3.1175                         |
| 118.2                 | 0.00006      | 283.0       | 2.129                 | 0.0997            | 0.0507            | 2.711                                              | 1.9963                         |
| 146.8                 | 0.00006      | 300.1       | 2.100                 | 0.0893            | 0.0499            | 2.826                                              | 2.2022                         |
| 163.6                 | 0.00006      | 317.2       | 2.111                 | 0.0813            | 0.0494            | 2.791                                              | 1.8390                         |
| 180.5                 | 0            | 334.4       | 2.153                 | 0.0743            | 0.0419            | 2.938                                              | 2.1992                         |
| 197.4                 | 0.00006      | 428.6       | 2.340                 | 0.0221            | 0.0158            | 2.734                                              | 5.3574                         |
| 214.3                 | 0.00008      | 445.7       | 2.370                 | 0.0367            | 0.0222            | 2.657                                              | 3.0758                         |
| 231.1                 | 0.00011      | 462.9       | 2.320                 | 0.0249            | 0.0174            | 2.805                                              | 3.5766                         |
| 248.0                 | 0.0001       | 480.8       | 2.280                 | 0.0327            | 0.0208            | 2.793                                              | 3.1909                         |
| 264.9                 | 0.00013      | 497.1       | 2.340                 | 0.0319            | 0.0201            | 2.696                                              | 3.4224                         |
| 281.8                 | 0.00009      | 514.3       | 2.430                 | 0.0294            | 0.0204            | 2.535                                              | 3.3812                         |
| 298.7                 | 0.00019      | 531.4       | 2.460                 | 0.0221            | 0.0173            | 2.651                                              | 3.1070                         |
| 315.5                 | 0.00007      | 547.6       | 2.600                 | 0.0248            | 0.0183            | 2.395                                              | 4.0166                         |
| 332.4                 | 0.00009      | 564.5       | 2.540                 | 0.0314            | 0.0193            | 2.752                                              | 3.7635                         |
| 349.3                 | 0.00016      | 581.4       | 2.690                 | 0.0808            | 0.0287            | 2.721                                              | 2.8214                         |
| 366.2                 | 0.00016      | 598.3       | 3.020                 | 0.0438            | 0.0233            | 2.819                                              | 3.9406                         |
| 383.1                 | 0.00007      | 606.7       | 2.960                 | 0.0364            | 0.0224            | 2.897                                              | 4.1145                         |
| 399.9                 | 0.00009      | 623.6       | 3.210                 | 0.0697            | 0.0348            | 2.407                                              | 4.2705                         |
| 416.8                 | 0.00015      | 640.5       | 2.880                 | 0.1522            | 0.0526            | 2.522                                              | 2.5083                         |
| 429.5                 | 0.00023      | 657.3       | 3.020                 | 0.1215            | 0.0374            | 2.629                                              | 2.1477                         |
| 437.9                 | 0.0003       | 720.0       | 3.010                 | 0.1017            | 0.0500            | 2.462                                              | 2.7760                         |
| 446.4                 | 0.00036      | 741.0       | 4.250                 | 0.4706            | 0.0933            | 2.047                                              | 3.0768                         |
| 454.8                 | 0.00036      | 765.0       | 8.440                 | 0.8932            | 0.2313            | 1.962                                              | 2.2107                         |
| 463.2                 | 0.0002       | 863.0       | 7.520                 | 0.8500            | 0.2038            | 1.845                                              | 2.6150                         |
| 471.7                 | 0.00023      | 956.0       | 6.800                 | 0.6389            | 0.1728            | 1.776                                              | 2.7400                         |
| 480.1                 | 0.00027      | 1062.0      | 5.820                 | 0.6622            | 0.1536            | 1.983                                              | 3.0065                         |
| 488.6                 | 0.00019      | 1134.0      | 3.540                 | 0.3340            | 0.0937            | 2.372                                              | 2.3161                         |

|        |         |        |        |        |        |       |        |
|--------|---------|--------|--------|--------|--------|-------|--------|
| 497.0  | 0.00028 | 1184.0 | 3.290  | 0.5129 | 0.1190 | 2.112 | 2.7426 |
| 505.4  | 0.00017 | 1239.0 | 4.850  | 0.7286 | 0.1695 | 2.024 | 2.5151 |
| 513.9  | 0.00017 | 1295.0 | 3.800  | 0.4162 | 0.1044 | 2.281 | 2.3246 |
| 522.3  | 0.00032 | 1324.0 | 3.390  | 0.4515 | 0.1092 | 2.365 | 2.6907 |
| 530.7  | 0.00018 | 1361.0 | 2.220  | 0.1541 | 0.0538 | 3.078 | 2.5513 |
| 539.2  | 0.00019 | 1552.2 | 2.160  | 0.0480 | 0.0549 | 3.120 | 2.0503 |
| 547.6  | 0.00024 | 1822.7 | 1.810  | 0.0659 | 0.0370 | 3.167 | 1.9950 |
| 556.1  | 0.00017 | 2093.2 | 1.940  | 0.0554 | 0.0377 | 3.221 | 1.7231 |
| 564.5  | 0.00013 | 2228.4 | 1.990  | 0.1470 | 0.0524 | 3.073 | 1.9086 |
| 572.9  | 0.00022 | 2363.7 | 1.970  | 0.0809 | 0.0460 | 3.148 | 1.8367 |
| 581.4  | 0.00016 | 2634.2 | 1.870  | 0.0463 | 0.0309 | 3.256 | 2.1197 |
| 589.8  | 0       | 2769.4 | 2.050  | 0.0645 | 0.0867 | 2.979 | 1.9797 |
| 602.5  | 0       | 2904.7 | 1.950  | 0.1206 | 0.0594 | 3.154 | 2.0421 |
| 619.4  | 0.00033 | 3039.9 | 1.930  | 0.0369 | 0.0345 | 3.683 | 1.7744 |
| 636.2  | 0.00032 | 3215.0 | 1.960  | 0.1603 | 0.0649 | 3.068 | 2.0879 |
| 653.1  | 0.00027 | 3562.0 | 2.240  | 0.3123 | 0.0942 | 2.480 | 1.7727 |
| 670.0  | 0.00019 | 3767.0 | 2.110  | 0.3345 | 0.1227 | 2.624 | 1.7000 |
| 720.0  | 0.00027 | 3879.0 | 2.310  | 0.1452 | 0.0571 | 2.578 | 1.7798 |
| 729.0  | 0.00026 | 3918.0 | 2.090  | 0.0666 | 0.0467 | 2.872 | 1.7102 |
| 741.0  | 0.00034 | 3974.0 | 2.280  | 0.1007 | 0.0539 | 2.737 | 1.8396 |
| 752.5  | 0.00155 | 4007.0 | 2.520  | 0.1133 | 0.0608 | 2.770 | 1.7843 |
| 764.5  | 0.00392 | 4131.0 | 3.980  | 0.5088 | 0.1266 | 2.266 | 2.5408 |
| 822.5  | 0.0037  | 4229.0 | 4.460  | 0.3799 | 0.0834 | 2.225 | 2.4168 |
| 863.0  | 0.00187 | 4328.0 | 4.970  | 0.6320 | 0.1278 | 2.140 | 2.2455 |
| 914.5  | 0.00154 | 4427.0 | 7.960  | 0.5750 | 0.1349 | 2.317 | 1.6756 |
| 955.5  | 0.00086 | 4655.0 | 7.930  | 0.8823 | 0.2517 | 2.118 | 1.1672 |
| 1002.0 | 0.00072 | 4764.0 | 5.270  | 0.7273 | 0.1968 | 2.076 | 1.1436 |
| 1061.5 | 0.00085 | 4874.0 | 3.530  | 0.4692 | 0.0933 | 2.250 | 2.9289 |
| 1106.5 | 0       | 4960.0 | 5.790  | 0.4226 | 0.0964 | 1.903 | 2.0121 |
| 1134.0 | 0       | 5054.0 | 5.290  | 0.4480 | 0.1191 | 2.003 | 2.1983 |
| 1157.5 | 0.00019 | 5127.0 | 3.810  | 0.3305 | 0.0848 | 2.119 | 2.2057 |
| 1183.5 | 0.0002  | 5238.0 | 6.110  | 0.4762 | 0.1112 | 2.123 | 1.6187 |
| 1211.0 | 0.00019 | 5378.0 | 6.170  | 0.5164 | 0.1942 | 2.056 | 1.6593 |
| 1239.0 | 0.00022 | 5510.0 | 3.760  | 0.3208 | 0.1079 | 2.158 | 1.7833 |
| 1267.5 | 0.00027 | 5642.0 | 2.000  | 0.1019 | 0.0566 | 2.706 | 1.7603 |
| 1295.0 | 0.00041 | 5744.0 | 1.690  | 0.0323 | 0.0319 | 2.624 | 1.9694 |
| 1305.0 | 0.00031 | 5838.0 | 2.190  | 0.0331 | 0.0448 | 2.584 | 1.9755 |
| 1323.5 | 0.00023 | 5944.0 | 4.360  | 0.4589 | 0.1910 | 2.178 | 1.9384 |
| 1332.5 | 0.00021 | 6026.0 | 2.130  | 0.0972 | 0.0829 | 2.247 | 2.5767 |
| 1352.0 | 0.0001  | 6140.0 | 2.160  | 0.0907 | 0.0729 | 2.421 | 2.5693 |
| 1360.5 | 0.00007 | 6259.0 | 3.270  | 0.4013 | 0.2081 | 1.994 | 3.0530 |
| 1371.0 | 0.00008 | 6378.0 | 3.020  | 0.1718 | 0.1189 | 2.068 | 2.9921 |
| 1522.0 | 0.00006 | 6465.0 | 10.260 | 0.9688 | 0.3891 | 1.687 | 1.5676 |
| 1676.5 | 0.00007 | 6524.0 | 2.570  | 0.0188 | 0.0197 | 2.733 | 2.8887 |
| 1828.5 | 0.00011 | 6559.0 | 1.930  | 0.0000 | 0.0188 | 3.014 | 3.3992 |
| 1992.5 | 0.00006 | 6594.0 | 2.360  | 0.0488 | 0.0338 | 3.000 | 2.7112 |

|        |         |        |       |        |        |       |        |
|--------|---------|--------|-------|--------|--------|-------|--------|
| 2183.5 | 0       | 6629.0 | 2.960 | 0.0893 | 0.0542 | 2.369 | 2.7436 |
| 2369.0 | 0.00005 | 6691.0 | 3.260 | 0.0592 | 0.0290 | 2.306 | 4.5600 |
| 2548.5 | 0.00009 | 6897.3 | 3.330 | 0.0640 | 0.0264 | 2.986 | 3.9312 |
| 2652.5 | 0.00004 | 6949.5 | 3.230 | 0.0237 | 0.0155 | 3.482 | 4.0301 |
| 2792.0 | 0.00007 | 6975.7 | 3.400 | 0.0436 | 0.0156 | 3.200 | 4.0423 |
| 2941.0 | 0.00002 | 7027.9 | 2.790 | 0.0456 | 0.0153 | 3.182 | 3.2729 |
| 3089.0 | 0.00005 | 7080.2 | 2.350 | 0.0400 | 0.0169 | 3.287 | 1.9786 |
| 3145.0 | 0.00004 | 7132.5 | 2.300 | 0.0238 | 0.0152 | 3.957 | 4.7500 |
| 3214.5 | 0.00004 | 7184.8 | 1.930 | 0.0244 | 0.0182 | 4.299 | 2.3979 |
| 3286.5 | 0.00007 | 7237.1 | 1.610 | 0.0000 | 0.0211 | 4.281 | 2.3289 |
| 3351.0 | 0.00004 | 7315.5 | 1.030 | 0.0000 | 0.0000 | 4.119 |        |
| 3432.0 | 0.00006 | 7341.6 | 1.180 | 0.0000 | 0.0000 | 4.086 |        |
| 3496.5 | 0.00009 | 7393.9 | 1.160 | 0.0000 | 0.0000 | 3.948 |        |
| 3561.5 | 0.00009 | 7446.2 | 1.080 | 0.0000 | 0.0000 | 4.558 |        |
| 3613.5 | 0.00006 | 7498.4 | 0.920 | 0.0000 | 0.0000 | 3.958 |        |
| 3652.5 | 0.00008 |        |       |        |        |       |        |
| 3710.0 | 0.00007 |        |       |        |        |       |        |
| 3766.5 | 0.0001  |        |       |        |        |       |        |
| 3841.0 | 0.00011 |        |       |        |        |       |        |
| 3878.5 | 0.00012 |        |       |        |        |       |        |
| 3917.5 | 0.00007 |        |       |        |        |       |        |
| 3974.0 | 0.00007 |        |       |        |        |       |        |
| 4006.5 | 0.0001  |        |       |        |        |       |        |
| 4074.5 | 0.00018 |        |       |        |        |       |        |
| 4131.0 | 0.00032 |        |       |        |        |       |        |
| 4170.0 | 0.00028 |        |       |        |        |       |        |
| 4229.0 | 0.0004  |        |       |        |        |       |        |
| 4287.5 | 0.00156 |        |       |        |        |       |        |
| 4328.0 | 0.0009  |        |       |        |        |       |        |
| 4384.5 | 0.00292 |        |       |        |        |       |        |
| 4426.5 | 0.00216 |        |       |        |        |       |        |
| 4562.5 | 0.00381 |        |       |        |        |       |        |
| 4654.5 | 0.00322 |        |       |        |        |       |        |
| 4702.5 | 0.00208 |        |       |        |        |       |        |
| 4764.0 | 0.00142 |        |       |        |        |       |        |
| 4810.0 | 0.00054 |        |       |        |        |       |        |
| 4873.5 | 0.00049 |        |       |        |        |       |        |
| 4923.0 | 0.00037 |        |       |        |        |       |        |
| 4960.0 | 0.001   |        |       |        |        |       |        |
| 5008.0 | 0.00109 |        |       |        |        |       |        |
| 5044.5 | 0.00041 |        |       |        |        |       |        |
| 5092.5 | 0.00099 |        |       |        |        |       |        |
| 5127.0 | 0.0005  |        |       |        |        |       |        |
| 5172.5 | 0.0003  |        |       |        |        |       |        |
| 5237.5 | 0.00089 |        |       |        |        |       |        |
| 5304.5 | 0.00088 |        |       |        |        |       |        |

|        |         |  |  |  |  |  |
|--------|---------|--|--|--|--|--|
| 5377.5 | 0.00135 |  |  |  |  |  |
| 5452.0 | 0.00077 |  |  |  |  |  |
| 5510.0 | 0.00038 |  |  |  |  |  |
| 5586.5 | 0.00007 |  |  |  |  |  |
| 5641.5 | 0.00009 |  |  |  |  |  |
| 5692.5 | 0.00014 |  |  |  |  |  |
| 5743.5 | 0.00019 |  |  |  |  |  |
| 5785.0 | 0.00013 |  |  |  |  |  |
| 5838.0 | 0.00017 |  |  |  |  |  |
| 5891.5 | 0.00029 |  |  |  |  |  |
| 5943.5 | 0.00058 |  |  |  |  |  |
| 5984.0 | 0.00023 |  |  |  |  |  |
| 6025.5 | 0.00017 |  |  |  |  |  |
| 6088.5 | 0.00015 |  |  |  |  |  |
| 6139.5 | 0.0002  |  |  |  |  |  |
| 6200.0 | 0.00021 |  |  |  |  |  |
| 6259.0 | 0.00043 |  |  |  |  |  |
| 6309.5 | 0.00038 |  |  |  |  |  |
| 6378.0 | 0.00132 |  |  |  |  |  |
| 6435.5 | 0.00348 |  |  |  |  |  |
| 6465.1 | 0.00405 |  |  |  |  |  |
| 6494.8 | 0.00302 |  |  |  |  |  |
| 6524.4 | 0.00034 |  |  |  |  |  |
| 6541.8 | 0.00038 |  |  |  |  |  |
| 6559.3 | 0.00019 |  |  |  |  |  |
| 6576.8 | 0.00018 |  |  |  |  |  |
| 6594.2 | 0.00043 |  |  |  |  |  |
| 6611.7 | 0.00016 |  |  |  |  |  |
| 6629.2 | 0.00019 |  |  |  |  |  |
| 6646.6 | 0.0003  |  |  |  |  |  |
| 6691.1 | 0.00026 |  |  |  |  |  |
| 6730.6 | 0.00026 |  |  |  |  |  |
| 6770.1 | 0.00023 |  |  |  |  |  |
| 6809.6 | 0.00036 |  |  |  |  |  |
| 6868.8 | 0.00043 |  |  |  |  |  |
| 6979.9 | 0.00051 |  |  |  |  |  |
| 7032.3 | 0.00022 |  |  |  |  |  |
| 7084.7 | 0.00011 |  |  |  |  |  |
| 7189.5 | 0.00004 |  |  |  |  |  |
| 7241.8 | 0       |  |  |  |  |  |
| 7346.6 | 0       |  |  |  |  |  |
| 7396.6 | 0       |  |  |  |  |  |
| 7496.6 | 0       |  |  |  |  |  |



**Table S2**

| Year for Mo/Al | Mo/Al   | Year   | Total % Carbon | Zeaxanthin | Echinenone | $\delta^{15}\text{N}$ vs air (‰) | Pheophytin-a/ Chl-a |
|----------------|---------|--------|----------------|------------|------------|----------------------------------|---------------------|
| 0.4            | 0.00486 | 1.2    | 17.772         | 0.9601     | 0.2625     | 3.194                            | 0.7006              |
| 0.9            | 0.00455 | 4.9    | 13.157         | 0.7230     | 0.2441     | 3.526                            | 1.4285              |
| 1.5            | 0.00453 | 11.6   | 13.117         | 0.6148     | 0.1936     | 3.566                            | 1.3947              |
| 2.1            | 0.00474 | 19.2   | 11.841         | 0.8366     | 0.2461     | 3.130                            | 0.9503              |
| 3.4            | 0.00416 | 25.9   | 10.933         | 0.6745     | 0.1640     | 3.183                            | 0.8247              |
| 4.9            | 0.00423 | 39.1   | 10.505         | 0.7005     | 0.1327     | 3.356                            | 0.8280              |
| 6.4            | 0.00309 | 46.4   | 9.735          | 0.7139     | 0.1144     | 3.455                            | 1.2415              |
| 9.0            | 0.00292 | 66.4   | 7.477          | 0.4937     | 0.0828     | 3.618                            | 1.3427              |
| 11.6           | 0.00295 | 88.0   | 4.674          | 0.1238     | 0.0359     | 4.104                            | 1.5047              |
| 14.3           | 0.00223 | 141.9  | 3.470          | 0.1480     | 0.0429     | 4.027                            | 1.5352              |
| 16.7           | 0.00339 | 156.5  | 2.784          | 0.1297     | 0.0471     | 3.570                            | 1.6895              |
| 19.2           | 0.00361 | 175.0  | 2.698          | 0.1107     | 0.0424     | 3.469                            | 1.8026              |
| 25.9           | 0.00384 | 191.1  | 6.387          | 0.0401     | 0.0170     | 3.718                            | 2.0841              |
| 32.7           | 0.00276 | 218.0  | 3.025          | 0.1133     | 0.0505     | 3.397                            | 1.6996              |
| 39.1           | 0.00294 | 244.9  | 3.198          | 0.0949     | 0.0334     | 3.234                            | 1.6892              |
| 46.4           | 0.00325 | 271.7  | 3.144          | 0.0911     | 0.0433     | 3.100                            | 1.9017              |
| 54.6           | 0.00270 | 298.6  | 3.291          | 0.0801     | 0.0422     | 2.925                            | 1.6550              |
| 66.4           | 0.00301 | 325.5  | 3.084          | 0.0769     | 0.0369     | 2.971                            | 1.9370              |
| 88.0           | 0.00051 | 352.4  | 3.179          | 0.0719     | 0.0352     | 2.938                            | 1.9380              |
| 112.7          | 0.00060 | 379.3  | 3.304          | 0.0786     | 0.0385     | 3.080                            | 1.9325              |
| 141.9          | 0.00044 | 406.1  | 3.327          | 0.0831     | 0.0325     | 2.986                            | 2.3974              |
| 156.5          | 0.00020 | 433.0  | 3.336          | 0.0612     | 0.0294     | 2.882                            | 2.3366              |
| 172.6          | 0.00000 | 459.9  | 3.267          | 0.0608     | 0.0321     | 2.602                            | 2.7400              |
| 183.4          | 0.00000 | 486.8  | 3.661          | 0.0563     | 0.0220     | 2.823                            | 3.3527              |
| 194.1          | 0.00000 | 513.7  | 3.759          | 0.0631     | 0.0358     | 2.701                            | 2.2027              |
| 204.8          | 0.00000 | 540.5  | 3.951          | 0.0704     | 0.0357     | 2.816                            | 1.8450              |
| 215.6          | 0.00000 | 567.4  | 3.653          | 0.0901     | 0.0326     | 2.814                            | 1.6999              |
| 226.3          | 0.00000 | 594.3  | 4.244          | 0.1228     | 0.0374     | 2.756                            | 2.0909              |
| 237.0          | 0.00000 | 621.2  | 4.538          | 0.1839     | 0.0435     | 2.692                            | 2.1081              |
| 247.8          | 0.00000 | 648.1  | 6.055          | 0.1789     | 0.0452     | 2.824                            | 1.9075              |
| 258.5          | 0.00000 | 674.9  | 5.520          | 0.2425     | 0.0536     | 2.766                            | 2.3209              |
| 269.2          | 0.00000 | 701.8  | 4.462          | 0.1246     | 0.0373     | 3.126                            | 1.6748              |
| 280.0          | 0.00000 | 728.7  | 4.812          | 0.5687     | 0.1144     | 2.381                            | 2.2557              |
| 290.7          | 0.00000 | 784.4  | 10.729         | 0.9728     | 0.2621     | 3.170                            | 1.7726              |
| 301.4          | 0.00000 | 884.0  | 8.837          | 1.2580     | 0.2647     | 2.781                            | 1.3373              |
| 312.2          | 0.00000 | 949.0  | 6.945          | 1.1833     | 0.1900     | 2.685                            | 1.4059              |
| 322.9          | 0.00000 | 1002.0 | 6.358          | 0.7459     | 0.1596     | 2.243                            | 1.6845              |
| 333.6          | 0.00017 | 1345.1 | 4.803          | 0.5148     | 0.1166     | 2.683                            | 1.8439              |
| 344.4          | 0.00000 | 1371.0 | 6.160          | 0.7974     | 0.1803     | 2.585                            | 1.4599              |
| 355.1          | 0.00000 | 1499.1 | 5.876          | 0.7249     | 0.1052     | 2.830                            | 1.5707              |
| 365.8          | 0.00000 | 1576.1 | 3.722          | 0.1474     | 0.0489     | 3.297                            | 1.4348              |
| 376.5          | 0.00000 | 1653.1 | 2.972          | 0.1075     | 0.0404     | 3.608                            | 1.3914              |
| 387.3          | 0.00010 | 1730.1 | 5.613          | 0.1700     | 0.0450     | 3.946                            | 1.2601              |

|        |         |        |        |        |        |       |        |
|--------|---------|--------|--------|--------|--------|-------|--------|
| 398.0  | 0.00020 | 1838.2 | 4.561  | 0.4034 | 0.0820 | 2.797 | 1.3196 |
| 408.7  | 0.00020 | 1918.3 | 4.881  | 0.4091 | 0.0954 | 2.941 | 1.2875 |
| 419.5  | 0.00000 | 1998.3 | 2.955  | 0.0852 | 0.0435 | 3.586 | 1.3091 |
| 430.2  | 0.00000 | 2078.4 | 6.343  | 0.0516 | 0.0201 | 3.384 | 1.6005 |
| 440.9  | 0.00000 | 2158.4 | 2.923  | 0.1164 | 0.0520 | 3.140 | 1.1115 |
| 451.7  | 0.00000 | 2238.4 | 2.708  | 0.1097 | 0.0572 | 3.467 | 1.1039 |
| 462.4  | 0.00000 | 2318.5 | 3.588  | 0.1671 | 0.0533 | 3.127 | 1.1385 |
| 473.1  | 0.00035 | 2397.1 | 3.544  | 0.1612 | 0.0492 | 3.226 | 1.1807 |
| 483.9  | 0.00000 | 2466.7 | 3.548  | 0.1557 | 0.0487 | 3.363 | 1.1572 |
| 494.6  | 0.00021 | 2526.7 | 3.500  | 0.1599 | 0.0566 | 3.325 | 1.0631 |
| 505.3  | 0.00071 | 2586.7 | 2.997  | 0.0788 | 0.0395 | 3.358 | 1.4683 |
| 516.1  | 0.00033 | 2646.7 | 2.886  | 0.0712 | 0.0336 | 3.353 | 1.3549 |
| 526.8  | 0.00037 | 2706.8 | 3.107  | 0.0606 | 0.0298 | 3.626 | 1.6364 |
| 537.5  | 0.00031 | 2766.8 | 3.274  | 0.0909 | 0.0410 | 3.526 | 1.2579 |
| 548.3  | 0.00040 | 2826.8 | 2.911  | 0.1144 | 0.0623 | 3.487 | 1.2078 |
| 559.0  | 0.00037 | 2877.3 | 3.722  | 0.0995 | 0.0456 | 3.198 | 1.3602 |
| 569.7  | 0.00043 | 2947.9 | 3.637  | 0.1464 | 0.0580 | 3.066 | 1.3933 |
| 580.5  | 0.00045 | 3010.0 | 2.400  | 0.1526 | 0.0741 | 3.148 | 1.1861 |
| 591.2  | 0.00040 | 3072.2 | 3.017  | 0.1005 | 0.0447 | 2.983 | 1.3630 |
| 601.9  | 0.00061 | 3134.3 | 3.084  | 0.1048 | 0.0445 | 3.697 | 1.3636 |
| 612.7  | 0.00056 | 3273.8 | 4.200  | 0.2276 | 0.0683 | 3.004 | 1.1853 |
| 623.4  | 0.00118 | 3378.1 | 3.163  | 0.1794 | 0.0693 | 3.041 | 1.1863 |
| 634.1  | 0.00095 | 3482.3 | 3.733  | 0.5376 | 0.1078 | 2.714 | 1.1163 |
| 644.9  | 0.00057 | 3586.6 | 4.797  | 0.7245 | 0.1233 | 2.666 | 1.1074 |
| 655.6  | 0.00134 | 3784.1 | 4.668  | 0.4236 | 0.1096 | 2.963 | 1.0746 |
| 666.3  | 0.00075 | 3996.9 | 4.051  | 0.2942 | 0.0686 | 2.992 | 1.2255 |
| 677.1  | 0.00063 | 4123.6 | 4.822  | 0.5509 | 0.1026 | 2.703 | 1.0457 |
| 687.8  | 0.00048 | 4250.3 | 5.614  | 0.7813 | 0.1681 | 3.957 | 1.4560 |
| 698.5  | 0.00062 | 4430.0 | 6.807  | 0.7310 | 0.1538 | 2.980 | 1.3675 |
| 709.3  | 0.00132 | 4460.9 | 9.580  | 0.9318 | 0.2249 | 2.630 | 1.0594 |
| 720.0  | 0.00171 | 4589.7 | 7.555  | 1.2164 | 0.2768 | 2.641 | 0.7160 |
| 729.0  | 0.00359 | 4718.5 | 7.577  | 1.1343 | 0.2327 | 2.667 | 1.2482 |
| 752.5  | 0.00377 | 4847.4 | 4.999  | 0.5554 | 0.0885 | 2.681 | 1.6911 |
| 764.5  | 0.00457 | 4943.1 | 6.941  | 0.6728 | 0.1158 | 3.013 | 1.5046 |
| 813.0  | 0.00360 | 5089.9 | 6.090  | 0.8609 | 0.1319 | 2.733 | 1.3811 |
| 842.5  | 0.00382 | 5236.7 | 8.181  | 0.9945 | 0.1208 | 3.057 | 1.0986 |
| 884.0  | 0.00338 | 5383.5 | 6.037  | 0.8924 | 0.2612 | 2.648 | 0.7539 |
| 914.5  | 0.00531 | 5530.3 | 5.149  | 0.7898 | 0.1608 | 3.041 | 1.2581 |
| 955.5  | 0.00187 | 5677.1 | 3.608  | 0.0989 | 0.0412 | 3.597 | 1.3424 |
| 975.5  | 0.00199 | 5824.0 | 5.083  | 0.5781 | 0.1610 | 2.716 | 1.6058 |
| 985.5  | 0.00184 | 5977.5 | 4.417  | 0.5495 | 0.1715 | 2.706 | 1.5027 |
| 1002.0 | 0.00262 | 6043.1 | 3.669  | 0.2117 | 0.0865 | 2.619 | 2.0949 |
| 1106.5 | 0.00083 | 6265.0 | 4.513  | 0.2748 | 0.1678 | 2.131 | 2.2345 |
| 1203.0 | 0.00050 | 6429.5 | 11.346 | 0.6417 | 0.3080 | 3.230 | 1.1921 |
| 1295.0 | 0.00203 | 6485.5 | 4.220  | 0.4456 | 0.1108 | 2.749 | 1.3908 |
| 1332.5 | 0.00123 | 6541.0 | 3.610  | 1.0266 | 0.1369 | 3.570 | 1.5798 |

|        |         |        |       |        |        |       |        |
|--------|---------|--------|-------|--------|--------|-------|--------|
| 1371.0 | 0.00230 | 6659.7 | 4.408 | 0.7304 | 0.0829 | 2.534 | 1.7061 |
| 1406.5 | 0.00060 | 6711.9 | 3.922 | 0.1492 | 0.0245 | 3.799 | 1.4478 |
| 1447.5 | 0.00054 | 6764.0 | 4.437 | 0.1812 | 0.0286 | 3.729 | 1.4583 |
| 1485.0 | 0.00035 | 6816.2 | 3.993 | 0.1130 | 0.0239 | 3.395 | 1.3870 |
| 1522.0 | 0.00000 |        |       |        |        |       |        |
| 1567.5 | 0.00019 |        |       |        |        |       |        |
| 1603.5 | 0.00000 |        |       |        |        |       |        |
| 1640.5 | 0.00000 |        |       |        |        |       |        |
| 1676.5 | 0.00013 |        |       |        |        |       |        |
| 1715.5 | 0.00033 |        |       |        |        |       |        |
| 1752.5 | 0.00023 |        |       |        |        |       |        |
| 1789.0 | 0.00015 |        |       |        |        |       |        |
| 1828.5 | 0.00000 |        |       |        |        |       |        |
| 1865.0 | 0.00023 |        |       |        |        |       |        |
| 1892.0 | 0.00068 |        |       |        |        |       |        |
| 1928.5 | 0.00044 |        |       |        |        |       |        |
| 1957.5 | 0.00000 |        |       |        |        |       |        |
| 1992.5 | 0.00000 |        |       |        |        |       |        |
| 2020.0 | 0.00000 |        |       |        |        |       |        |
| 2056.5 | 0.00000 |        |       |        |        |       |        |
| 2084.5 | 0.00019 |        |       |        |        |       |        |
| 2118.0 | 0.00000 |        |       |        |        |       |        |
| 2145.5 | 0.00000 |        |       |        |        |       |        |
| 2183.5 | 0.00015 |        |       |        |        |       |        |
| 2212.5 | 0.00000 |        |       |        |        |       |        |
| 2250.5 | 0.00000 |        |       |        |        |       |        |
| 2281.5 | 0.00022 |        |       |        |        |       |        |
| 2308.0 | 0.00000 |        |       |        |        |       |        |
| 2342.0 | 0.00021 |        |       |        |        |       |        |
| 2369.0 | 0.00000 |        |       |        |        |       |        |
| 2403.5 | 0.00021 |        |       |        |        |       |        |
| 2429.0 | 0.00000 |        |       |        |        |       |        |
| 2463.0 | 0.00029 |        |       |        |        |       |        |
| 2489.5 | 0.00018 |        |       |        |        |       |        |
| 2523.5 | 0.00012 |        |       |        |        |       |        |
| 2548.5 | 0.00026 |        |       |        |        |       |        |
| 2565.0 | 0.00000 |        |       |        |        |       |        |
| 2589.5 | 0.00000 |        |       |        |        |       |        |
| 2608.5 | 0.00000 |        |       |        |        |       |        |
| 2626.0 | 0.00015 |        |       |        |        |       |        |
| 2652.5 | 0.00000 |        |       |        |        |       |        |
| 2675.0 | 0.00000 |        |       |        |        |       |        |
| 2694.0 | 0.00011 |        |       |        |        |       |        |
| 2722.0 | 0.00000 |        |       |        |        |       |        |
| 2753.0 | 0.00019 |        |       |        |        |       |        |
| 2771.5 | 0.00000 |        |       |        |        |       |        |

|        |         |  |  |  |  |  |
|--------|---------|--|--|--|--|--|
| 2792.0 | 0.00000 |  |  |  |  |  |
| 2823.0 | 0.00000 |  |  |  |  |  |
| 2842.5 | 0.00000 |  |  |  |  |  |
| 2863.0 | 0.00000 |  |  |  |  |  |
| 2900.0 | 0.00012 |  |  |  |  |  |
| 2921.0 | 0.00000 |  |  |  |  |  |
| 2941.0 | 0.00000 |  |  |  |  |  |
| 2962.0 | 0.00000 |  |  |  |  |  |
| 2994.0 | 0.00000 |  |  |  |  |  |
| 3015.5 | 0.00000 |  |  |  |  |  |
| 3036.5 | 0.00000 |  |  |  |  |  |
| 3068.5 | 0.00000 |  |  |  |  |  |
| 3089.0 | 0.00000 |  |  |  |  |  |
| 3119.0 | 0.00000 |  |  |  |  |  |
| 3171.0 | 0.00014 |  |  |  |  |  |
| 3214.5 | 0.00000 |  |  |  |  |  |
| 3258.5 | 0.00030 |  |  |  |  |  |
| 3298.0 | 0.00018 |  |  |  |  |  |
| 3351.0 | 0.00018 |  |  |  |  |  |
| 3390.0 | 0.00000 |  |  |  |  |  |
| 3432.0 | 0.00051 |  |  |  |  |  |
| 3470.0 | 0.00034 |  |  |  |  |  |
| 3521.5 | 0.00000 |  |  |  |  |  |
| 3561.5 | 0.00031 |  |  |  |  |  |
| 3613.5 | 0.00025 |  |  |  |  |  |
| 3677.5 | 0.00031 |  |  |  |  |  |
| 3749.0 | 0.00055 |  |  |  |  |  |
| 3841.0 | 0.00035 |  |  |  |  |  |
| 3917.5 | 0.00000 |  |  |  |  |  |
| 3974.0 | 0.00018 |  |  |  |  |  |
| 4054.5 | 0.00150 |  |  |  |  |  |
| 4113.0 | 0.00087 |  |  |  |  |  |
| 4190.0 | 0.00080 |  |  |  |  |  |
| 4249.0 | 0.00037 |  |  |  |  |  |
| 4328.0 | 0.00280 |  |  |  |  |  |
| 4384.5 | 0.00229 |  |  |  |  |  |
| 4426.5 | 0.00092 |  |  |  |  |  |
| 4443.0 | 0.00327 |  |  |  |  |  |
| 4485.0 | 0.00220 |  |  |  |  |  |
| 4505.5 | 0.00498 |  |  |  |  |  |
| 4545.0 | 0.00426 |  |  |  |  |  |
| 4562.5 | 0.00806 |  |  |  |  |  |
| 4643.5 | 0.00372 |  |  |  |  |  |
| 4690.0 | 0.00221 |  |  |  |  |  |
| 4738.5 | 0.00197 |  |  |  |  |  |
| 4776.5 | 0.00317 |  |  |  |  |  |

|        |         |  |  |  |  |  |
|--------|---------|--|--|--|--|--|
| 4825.0 | 0.00184 |  |  |  |  |  |
| 4873.5 | 0.00073 |  |  |  |  |  |
| 4923.0 | 0.00182 |  |  |  |  |  |
| 4960.0 | 0.00257 |  |  |  |  |  |
| 5019.0 | 0.00185 |  |  |  |  |  |
| 5067.5 | 0.00173 |  |  |  |  |  |
| 5127.0 | 0.00231 |  |  |  |  |  |
| 5172.5 | 0.00091 |  |  |  |  |  |
| 5237.5 | 0.00229 |  |  |  |  |  |
| 5304.5 | 0.00194 |  |  |  |  |  |
| 5377.5 | 0.00216 |  |  |  |  |  |
| 5426.5 | 0.00106 |  |  |  |  |  |
| 5488.0 | 0.00100 |  |  |  |  |  |
| 5541.5 | 0.00136 |  |  |  |  |  |
| 5586.5 | 0.00020 |  |  |  |  |  |
| 5661.0 | 0.00000 |  |  |  |  |  |
| 5735.0 | 0.00016 |  |  |  |  |  |
| 5795.5 | 0.00050 |  |  |  |  |  |
| 5870.0 | 0.00071 |  |  |  |  |  |
| 5943.5 | 0.00138 |  |  |  |  |  |
| 5973.0 | 0.00090 |  |  |  |  |  |
| 5993.0 | 0.00024 |  |  |  |  |  |
| 6025.5 | 0.00035 |  |  |  |  |  |
| 6100.0 | 0.00017 |  |  |  |  |  |
| 6181.5 | 0.00027 |  |  |  |  |  |
| 6259.0 | 0.00119 |  |  |  |  |  |
| 6309.5 | 0.00030 |  |  |  |  |  |
| 6378.0 | 0.00212 |  |  |  |  |  |
| 6435.5 | 0.00429 |  |  |  |  |  |
| 6457.7 | 0.00322 |  |  |  |  |  |
| 6479.9 | 0.00136 |  |  |  |  |  |
| 6502.2 | 0.00018 |  |  |  |  |  |
| 6524.4 | 0.00000 |  |  |  |  |  |
| 6585.5 | 0.00020 |  |  |  |  |  |
| 6646.6 | 0.00060 |  |  |  |  |  |
| 6661.4 | 0.00073 |  |  |  |  |  |
| 6676.2 | 0.00031 |  |  |  |  |  |
| 6691.1 | 0.00000 |  |  |  |  |  |
| 6713.3 | 0.00000 |  |  |  |  |  |
| 6735.5 | 0.00000 |  |  |  |  |  |
| 6757.7 | 0.00000 |  |  |  |  |  |
| 6779.9 | 0.00000 |  |  |  |  |  |
| 6802.2 | 0.00000 |  |  |  |  |  |
| 6824.4 | 0.00000 |  |  |  |  |  |
